# Supplementary material for: Enantioselective conjugate addition of boronic acids to enones catalyzed by O-monoacyltartaric acids
Source: Royal Society of Chemistry journal article supplement (doi:10.1039/c0cc03076g), 2010-01-01
Supplement: c0cc03076g.pdf [file c0cc03076g.pdf]

# **Enantioselective Conjugate Addition of Boronic Acids to Enones Catalyzed by *O*-Monoacyltartaric Acids**

Masaharu Sugiura,\* Mirai Tokudomi and Makoto Nakajima

*Graduate School of Pharmaceutical Sciences, Kumamoto University,  
5-1 Oe-honmachi, Kumamoto 862-0973, Japan*

## **Supplementary Information**

## Table of Contents

|                                                                                               |      |
|-----------------------------------------------------------------------------------------------|------|
| General Methods                                                                               | S-2  |
| Synthesis of Catalyst <b>1k</b>                                                               | S-3  |
| General Procedure for Conjugate Addition of Boronic Acids to Enones<br>Catalyzed by <b>1k</b> | S-4  |
| <sup>1</sup> H and <sup>13</sup> C NMR Spectra of New Compounds                               | S-8  |
| HPLC Traces of Optically Active Compounds                                                     | S-14 |
| References                                                                                    | S-23 |

## General Methods

Melting points (mp) are uncorrected. <sup>1</sup>H and <sup>13</sup>C NMR spectra were measured in CDCl<sub>3</sub> or DMSO-d<sub>6</sub> with JEOL JNM-ECX400 spectrometer. Tetramethylsilane (TMS) (δ = 0 ppm) and CDCl<sub>3</sub> (δ = 77.0 ppm) or DMSO-d<sub>6</sub> (δ = 39.52 ppm) served as internal standards for <sup>1</sup>H and <sup>13</sup>C NMR, respectively. Infrared spectra were recorded on JEOL JIR-6500W. Mass spectra were measured with JEOL JMS-DX303HF mass spectrometer. Optical rotations were recorded on JASCO P-1010 polarimeter. High-pressure liquid chromatography (HPLC) was performed on JASCO P-980 and UV-1575. Thin-layer chromatography (TLC) analysis was carried out using Merck silica gel plates. Visualization was accomplished with UV light, phosphomolybdic acid and/or anisaldehyde. Column chromatography was performed using Kanto Chemical Silica Gel 60N (spherical, neutral, 63-210 μm).

Chalcone (**2a**) was purchased from Tokyo Kasei Kogyo (TCI) and used without purification. Benzalacetone (**2b**) was purchased from TCI and used after vacuum distillation. Enone **2c** was prepared *via* addition of phenylmagnesium bromide to crotonaldehyde and subsequent MnO<sub>2</sub>-oxidation. Enone **2d** was prepared by TsOH-catalyzed aldol condensation of acetophenone with ethyl glyoxylate (polymer form) according to the literature.<sup>1</sup> Enones **2e** and **2f** were prepared by NaOH-promoted aldol condensation of acetophenone with the corresponding aldehyde.<sup>2</sup> (*E*)-Styrylboronic acid (**3a**) and (*E*)-1-octenylboronic acid (**3b**) were purchased from Sigma-Aldrich and used without purification. 2-Furanboronic acid (**3c**) and 2-benzofuranboronic acid (**3e**) were purchased from Wako Pure Chemical Industries and used without purification. Dichloromethane (dehydrated) and toluene (99%) were purchased from Kanto Chemical and nacalai tesque, respectively and stored over 4Å MS prior to use. All other solvents were purified based on standard procedures.

## Synthesis of Catalyst 1k

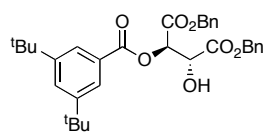

### (*R,R*)-Dibenzyl tartrate mono-3,5-di(*tert*-butyl)benzoate

To a solution of (*R,R*)-dibenzyl tartrate (495.8 mg, 1.50 mmol), triethylamine (0.33 mL, 2.34 mmol) and DMAP (4.5 mg, 2 mol %) in dry dichloromethane (6 mL) was added dropwise 3,5-di(*tert*-butyl)benzoyl chloride (379 mg, 1.0 equiv) in dry dichloromethane (4 mL) at rt. The reaction was stirred at rt for 19 h and quenched with water (10 mL). The mixture was extracted with dichloromethane (3×). The combined organic layers were dried over anhydrous Na<sub>2</sub>SO<sub>4</sub>, filtered, evaporated, and purified by silica gel column chromatography (SiO<sub>2</sub> 18g, hexane/Et<sub>2</sub>O/CH<sub>2</sub>Cl<sub>2</sub> = 5/1/3) to give (*R,R*)-dibenzyl tartrate mono-3,5-di(*tert*-butyl)benzoate (594.8 mg, 73%).

<sup>1</sup>H-NMR (400 MHz, CDCl<sub>3</sub>): δ 1.34 (s, 18H), 3.41 (d, *J* = 7.4 Hz, 1H), 4.92 (dd, *J* = 1.8, 7.4 Hz, 1H), 5.10 (d, *J* = 11.9 Hz, 1H), 5.24 (d, *J* = 11.9 Hz, 1H), 5.26 (s, 2H), 5.67 (d, *J* = 1.8 Hz, 1H), 7.05 - 7.38 (m, 10 H), 7.65 (s, 1H), 7.82 (s, 2H).

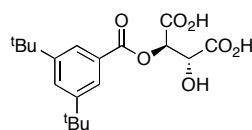

### (*R,R*)-Tartaric acid mono-3,5-di(*tert*-butyl)benzoate (**1k**)

A suspension of (*R,R*)-dibenzyl tartrate mono-3,5-di(*tert*-butyl)benzoate (594.8 mg, 1.09 mmol) and 10% Pd/C (59.4 mg) in ethyl acetate (20 mL) was vigorously stirred under hydrogen atmosphere at rt for 18 h. The mixture was filtered through a Celite pad with ethyl acetate and concentrated under vacuum to give (*R,R*)-tartaric acid mono-3,5-di(*tert*-butyl)benzoate (**1k**) (411.5 mg, quant).

mp 178-181 °C; [ $\alpha$ ]<sub>D</sub><sup>27</sup> -4.3 (c 1.00, ethanol); IR (KBr, cm<sup>-1</sup>) 3408, 2964, 1732, 1230, 1120, 1063, 895, 769, 702; <sup>1</sup>H-NMR (400 MHz, DMSO-*d*<sub>6</sub>) δ 1.32 (s, 18H), 4.66 (d, *J* = 2.3 Hz, 1H), 5.42 (d, *J* = 2.3 Hz, 1H), 7.71 (s, 1H), 7.84 (s, 2H); <sup>13</sup>C-NMR (100 MHz, DMSO-*d*<sub>6</sub>) δ 31.1, 34.6, 70.2, 74.1, 123.5, 127.6, 128.5, 151.0, 165.6, 168.3, 172.0; Anal. Calcd. for C<sub>19</sub>H<sub>26</sub>O<sub>7</sub>·0.8H<sub>2</sub>O C, 59.92; H, 7.31; Found: C, 59.79; H, 7.17.

### ***General Procedure for Conjugate Addition of Boronic Acids to Enones Catalyzed by 1k***

Under an argon atmosphere, a 20-mL screw-top test tube was charged with an enone **2** (0.3 mmol), a boronic acid **3** (0.36 mmol, 1.2 equiv), catalyst **1k** (11.1 mg, 10 mol %), methanol (0.72 mmol) and toluene (1 mL) at rt. Then, the mixture was heated at 50 °C for the indicated time (monitored by TLC analysis). The reaction mixture was cooled to rt and concentrate under vacuum. The residue was purified by silica gel column chromatography (hexane/AcOEt) to give an adduct **4**. The enantiomeric excess of **4** was determined by HPLC analysis using a chiral stationary phase column.

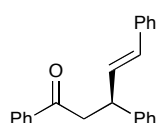

#### **(3*S*,4*E*)-1,3,5-Triphenylpent-4-en-1-one (4a)**

According to the general procedure, the reaction of chalcone (**2a**) (62.3 mg) and (*E*)-styrylboronic acid (**3a**) (53.5 mg) at 50 °C for 24 h gave adduct **4a** (86.0 mg, 92%, 87% ee (*S*)). The spectral data were consistent with the literature.<sup>3</sup> The absolute configuration was determined to be *S* in comparison with HPLC data.<sup>3</sup>

HPLC (Chiralpak AD-H, hexane/2-propanol = 200/1, flow rate = 1.0 mL/min, UV detection at 254 nm)  $t_R$  = 50.7 min (*R*, minor), 55.0 min (*S*, major).

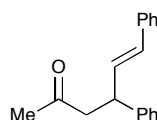

#### **(*E*)-4,6-Diphenylhex-5-en-2-one (4b)**

According to the general procedure, the reaction of benzalacetone (**2b**) (43.9 mg) and (*E*)-styrylboronic acid (**3a**) (53.3 mg) at 60 °C for 48 h gave adduct **4b** (34.6 mg, 46%, 81% ee). The spectral data were consistent with the literature.<sup>4</sup>

$[\alpha]_D^{28}$  –15.6 (c 2.07, CHCl<sub>3</sub> for 81% ee); HPLC (Chiralpak AD-H, hexane/2-propanol = 300/1, flow rate = 1.0 mL/min, UV detection at 254 nm)  $t_R$  = 32.1 min (minor), 37.0 min (major).

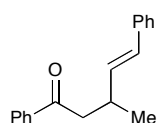

#### **(*E*)-1,5-Diphenyl-3-methylpent-4-en-1-one (4c)**

According to the general procedure, the reaction of (*E*)-1-phenylbut-2-en-1-one (**2c**) (44.2 mg) and (*E*)-styrylboronic acid (**3a**) (53.3 mg) at 50 °C for 24 h gave adduct **4c** (69.3 mg, 92%, 81% ee). The spectral data were consistent with the literature.<sup>5</sup>

$[\alpha]_D^{29} +45.3$  (c 1.09, CHCl<sub>3</sub> for 81% ee); HPLC (Chiralpak AD-H, hexane/2-propanol = 99/1, flow rate = 1.0 mL/min, UV detection at 254 nm)  $t_R$  = 10.2 min (major), 11.7 min (minor).

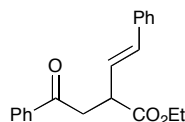

#### **Ethyl 4-oxo-4-phenyl-2-((*E*)-2-phenylethenyl)butanoate (**4d**)**

According to the general procedure, the reaction of (*E*)-ethyl 4-oxo-4-phenylbut-2-enoate (**2d**) (61.4 mg) and (*E*)-styrylboronic acid (**3a**) (53.1 mg) at 50 °C for 48 h gave adduct **4d** (68.4 mg, 74%, 85% ee).

mp 71-73 °C;  $[\alpha]_D^{28} +86.8$  (c 1.01, CHCl<sub>3</sub> for 85% ee); IR (KBr, cm<sup>-1</sup>) 3059, 3028, 2981, 1728, 1687, 1597, 1448, 1215, 1163, 966, 756, 692; <sup>1</sup>H-NMR (400 MHz, CDCl<sub>3</sub>)  $\delta$  1.27 (t,  $J$  = 7.3 Hz, 3H), 3.25 (dd,  $J$  = 4.6, 17.9 Hz, 1H), 3.69 (dd,  $J$  = 9.2, 17.9 Hz, 1H), 3.88 (ddd,  $J$  = 4.6, 8.2, 9.2 Hz, 1H), 4.19 (m, 2H), 6.28 (dd,  $J$  = 8.2, 16.0 Hz, 1H), 6.60 (d,  $J$  = 16.0 Hz, 1H), 7.24 (t,  $J$  = 7.8 Hz, 1H), 7.31 (t,  $J$  = 7.8 Hz, 2H), 7.37 (d,  $J$  = 7.8 Hz, 2H), 7.47 (t,  $J$  = 7.8 Hz, 2H), 7.57 (t,  $J$  = 7.8 Hz, 1H), 7.98 (d,  $J$  = 7.8 Hz, 2H); <sup>13</sup>C NMR (100 MHz, CDCl<sub>3</sub>)  $\delta$  14.1, 40.8, 44.2, 61.0, 126.1, 126.3, 127.7, 128.0, 128.5, 128.6, 132.7, 133.2, 136.43, 136.48, 173.2, 197.4; HRMS (FAB) Calcd. for C<sub>20</sub>H<sub>21</sub>O<sub>3</sub> (M+H<sup>+</sup>) 309.1491, found 309.1484; HPLC (Chiralpak AD-H, hexane/2-propanol = 19/1, flow rate = 1.0 mL/min, UV detection at 254nm)  $t_R$  = 16.1 min (minor), 19.8 min (major).

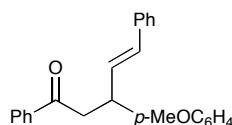

#### **(*E*)-3-(*p*-Methoxyphenyl)-1,5-diphenylpent-4-en-1-one (**4e**)**

According to the general procedure, the reaction of (*E*)-3-(*p*-methoxyphenyl)-1-phenylprop-2-en-1-one (**2e**) (71.5 mg) and (*E*)-styrylboronic acid (**3a**) (53.3 mg) at 50 °C for 24 h gave adduct **4e** (71.5 mg, 84%, 87% ee).

mp 64-66 °C;  $[\alpha]_D^{28} -7.7$  (c 0.97, CHCl<sub>3</sub> for 87% ee); IR (KBr, cm<sup>-1</sup>) 3352, 3059, 2933, 2835, 1693, 1597, 1514, 1446, 1257, 1178, 1034, 966, 829, 750, 692; <sup>1</sup>H-NMR (400 MHz, CDCl<sub>3</sub>)  $\delta$  3.44 (dd,  $J$  = 6.9, 16.5 Hz, 1H), 3.49 (dd,  $J$  = 7.4, 16.5 Hz, 1H), 3.78 (s, 3H), 4.25 (ddd,  $J$  = 5.5, 6.9, 7.4 Hz, 1H), 6.35 (d,  $J$  = 16.0 Hz, 1H), 6.40 (dd,  $J$  = 5.5, 16.0 Hz, 1H), 6.85 (d,  $J$  =

8.7 Hz, 2H), 7.15 - 7.32 (m, 7H), 7.44 (t,  $J = 7.6$  Hz, 2H), 7.54 (t,  $J = 7.3$  Hz, 1H), 7.93 (d,  $J = 7.3$  Hz, 2H);  $^{13}\text{C}$  NMR (100 MHz,  $\text{CDCl}_3$ )  $\delta$  43.0, 44.5, 55.1, 113.9, 126.1, 127.1, 128.0, 128.4, 128.5, 128.6, 129.6, 132.9, 133.0, 135.2, 137.0, 137.1, 158.1, 198.2; HRMS (FAB) : Calcd. for  $\text{C}_{24}\text{H}_{22}\text{O}_2\text{Na}$  ( $\text{M}+\text{Na}^+$ ) 365.1517, found 365.1530; HPLC (Chiralpak AS-H, hexane/2-propanol = 19/1, flow rate = 1.0 mL/min, UV detection at 254 nm)  $t_R = 14.5$  min (major), 16.9 min (minor).

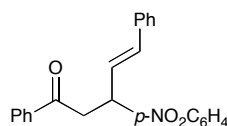

**(E)-3-(p-Nitrophenyl)-1,5-diphenylpent-4-en-1-one (4f)**

According to the general procedure, the reaction of (*E*)-3-(*p*-nitrophenyl)-1-phenylprop-2-en-1-one (**2f**) (76.2 mg) and (*E*)-styrylboronic acid (**3a**) (53.1 mg) at 50 °C for 24 h gave adduct **4f** (72.7 mg, 68%, 88% ee).

$[\alpha]_D^{29} +29.7$  (c 1.415,  $\text{CHCl}_3$  for 87% ee); IR (neat,  $\text{cm}^{-1}$ ) 3059, 2926, 2852, 1687, 1680, 1597, 1514, 1495, 1448, 1344, 1205, 1111, 968, 856, 746, 692;  $^1\text{H}$ -NMR (400 MHz,  $\text{CDCl}_3$ )  $\delta$  3.54 (dd,  $J = 7.4, 17.0$  Hz, 1H), 3.59 (dd,  $J = 6.9, 17.0$  Hz, 1H), 4.43 (ddd,  $J = 6.9, 6.9, 7.4$  Hz, 1H), 6.37 (dd,  $J = 6.9, 16.0$  Hz, 1H), 6.44 (d,  $J = 16.0$  Hz, 1H), 7.20-7.35 (m, 5H), 7.40-7.60 (m, 5H), 7.94 (d,  $J = 7.8$  Hz, 2H), 8.18 (d,  $J = 8.7$  Hz, 2H);  $^{13}\text{C}$  NMR (100 MHz,  $\text{CDCl}_3$ )  $\delta$  43.6, 43.9, 123.9, 126.3, 127.7, 128.0, 128.6, 128.71, 128.73, 130.8, 131.3, 133.4, 136.5, 136.6, 146.7, 150.9, 197.1; HPLC (Chiralpak AS-H, hexane/2-propanol = 9/1, flow rate = 1.0 mL/min, UV detection at 254 nm)  $t_R = 29.7$  min (major), 34.8 min (minor).

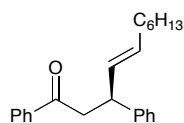

**(E)-1,3-Diphenylundec-4-en-1-one (4g)**

According to the general procedure, the reaction of chalcone (**2a**) (62.4 mg) and (*E*)-1-octenylboronic acid (**3b**) (56.0 mg) at 60 °C for 120 h gave adduct **4g** (46.1 mg, 48%, 69% ee (*S*)). The spectral data were consistent with the literature.<sup>3</sup> The absolute configuration was determined to be *S* in comparison with HPLC data.<sup>3</sup>

HPLC (Chiralcel OD-H, hexane/2-propanol = 99/1, flow rate = 1.0 mL/min, UV detection at 254nm)  $t_R = 6.8$  min (*R*, minor), 7.6 min (*S*, major).

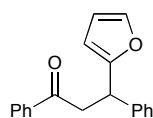

### 3-(Furan-2-yl)-1,3-diphenylpropan-1-one (**4h**)

According to the general procedure, the reaction of chalcone (**2a**) (62.5 mg) and 2-furanboronic acid (**3c**) (40.1 mg) at 50 °C for 24 h gave adduct **4h** (45.6 mg, 55%, 68% ee).  $[\alpha]_D^{28}$   $-35.7$  (c 0.955,  $\text{CHCl}_3$  for 68% ee); IR (neat,  $\text{cm}^{-1}$ ) 3061, 3028, 2924, 1684, 1597, 1508, 1448, 1144, 1078, 688;  $^1\text{H}$  NMR (400 MHz,  $\text{CDCl}_3$ )  $\delta$  3.56 (dd,  $J = 6.9, 17.0$  Hz, 1H), 3.82 (dd,  $J = 7.3, 17.0$  Hz, 1H), 4.84 (dd,  $J = 6.9, 7.3$  Hz, 1H), 6.03 (d,  $J = 3.2$  Hz, 1H), 6.26 (dd,  $J = 1.8, 3.2$  Hz, 1H), 7.19 - 7.32 (m, 6H), 7.44 (dd,  $J = 7.3, 7.8$  Hz, 2H), 7.55 (t,  $J = 7.3$  Hz, 1H), 7.93 (d,  $J = 7.8$  Hz, 2H);  $^{13}\text{C}$  NMR (100 MHz,  $\text{CDCl}_3$ )  $\delta$  40.2, 43.5, 105.7, 110.1, 126.8, 127.8, 128.0, 128.6, 133.1, 136.8, 141.5, 141.9, 156.7, 197.4 (one carbon is overlapped); HRMS (FAB) Calcd. for  $\text{C}_{19}\text{H}_{16}\text{O}_2\text{Na}$  ( $\text{M}+\text{Na}^+$ ) 299.1048, found 299.1038; HPLC (Chiralcel OD-3, hexane/2-propanol = 49/1, flow rate = 1.0 mL/min, UV detection at 254 nm)  $t_R$  = 9.8 min (minor), 10.2 min (major).

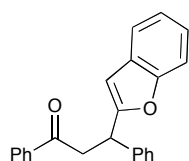

### 3-(Benzofuran-2-yl)-1,3-diphenylpropan-1-one (**4i**)

According to the general procedure, the reaction of chalcone (**2a**) (62.3 mg) and 2-benzofuranboronic acid (**3d**) (58.4 mg) at 50 °C for 24 h gave adduct **4i** (77.3 mg, 79%, 81% ee).  $[\alpha]_D^{28}$   $-73.2$  (c 0.715,  $\text{CHCl}_3$  for 81% ee); IR (neat,  $\text{cm}^{-1}$ ) 3032, 2891, 1676, 1599, 1579, 1495, 1454, 1236, 1165, 700;  $^1\text{H}$  NMR (400 MHz,  $\text{CDCl}_3$ )  $\delta$  3.67 (dd,  $J = 7.3, 17.4$  Hz, 1H), 3.94 (dd,  $J = 7.3, 17.4$  Hz, 1H), 4.98 (t,  $J = 7.3$  Hz, 1H), 6.43 (s, 1H), 7.12 - 7.58 (m, 12H), 7.96 (d,  $J = 7.4$  Hz, 2H);  $^{13}\text{C}$  NMR (400 MHz,  $\text{CDCl}_3$ )  $\delta$  40.5, 43.2, 102.9, 110.9, 120.5, 122.5, 123.5, 127.0, 127.9, 128.0, 128.5, 128.58, 128.65, 133.2, 136.6, 141.2, 154.7, 159.8, 197.1; HRMS (FAB) Calcd. for  $\text{C}_{23}\text{H}_{18}\text{O}_2\text{Na}$  ( $\text{M}+\text{Na}^+$ ) 349.1204, found 349.1202; HPLC (Chiralpak AD-H, hexane/2-propanol = 39/1, flow rate = 1.0 mL/min, UV detection at 254 nm)  $t_R$  = 19.0 min (major), 25.2 min (minor).

# *<sup>1</sup>H and <sup>13</sup>C NMR Spectra of New Compounds*

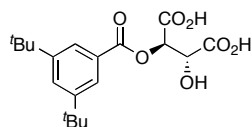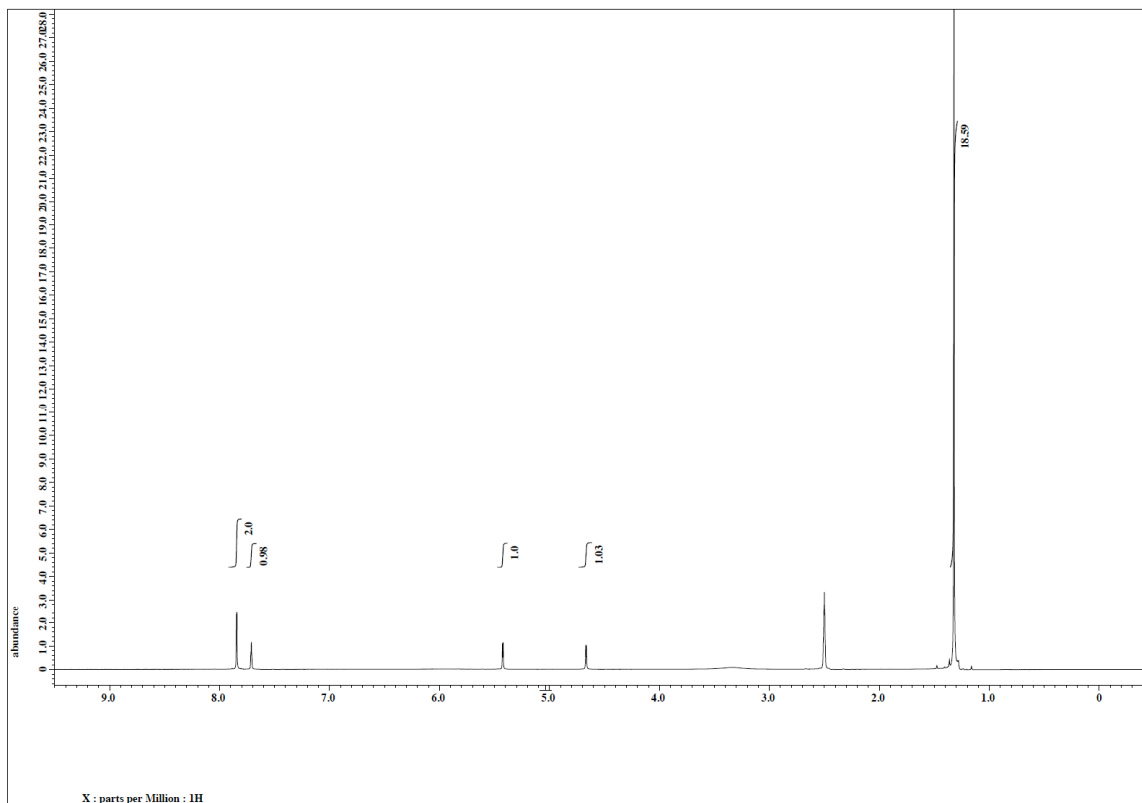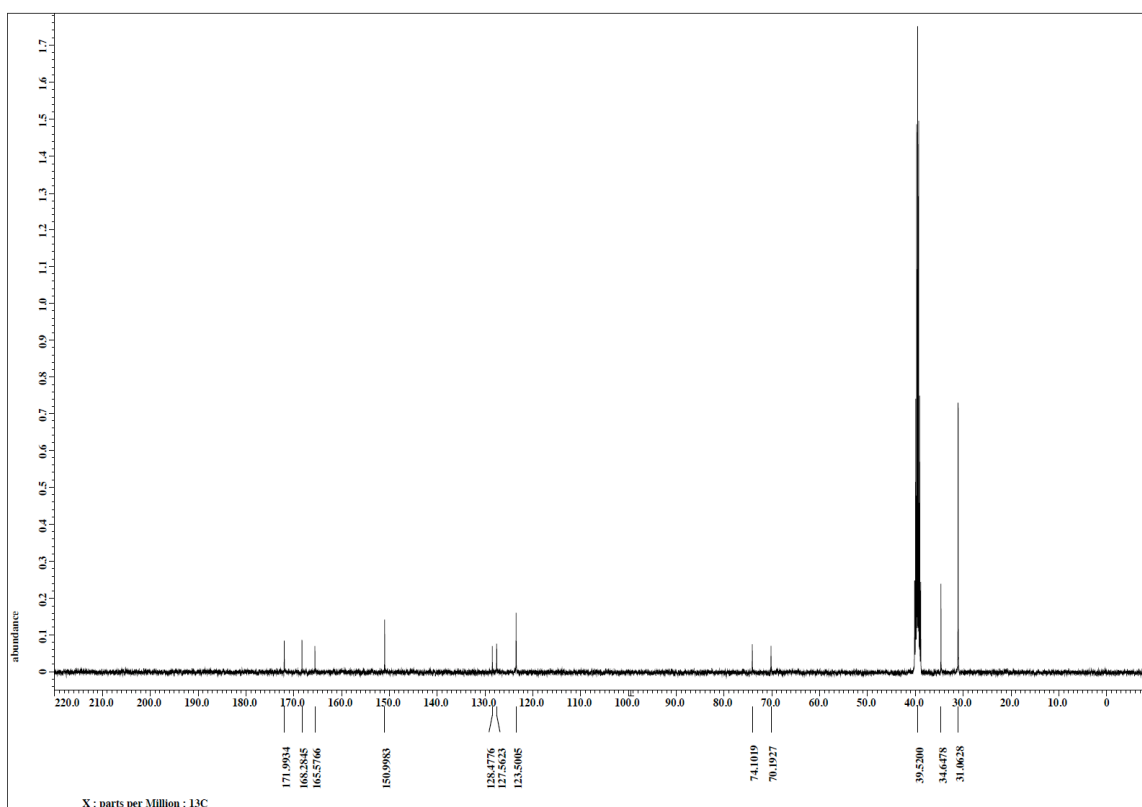



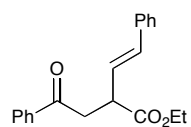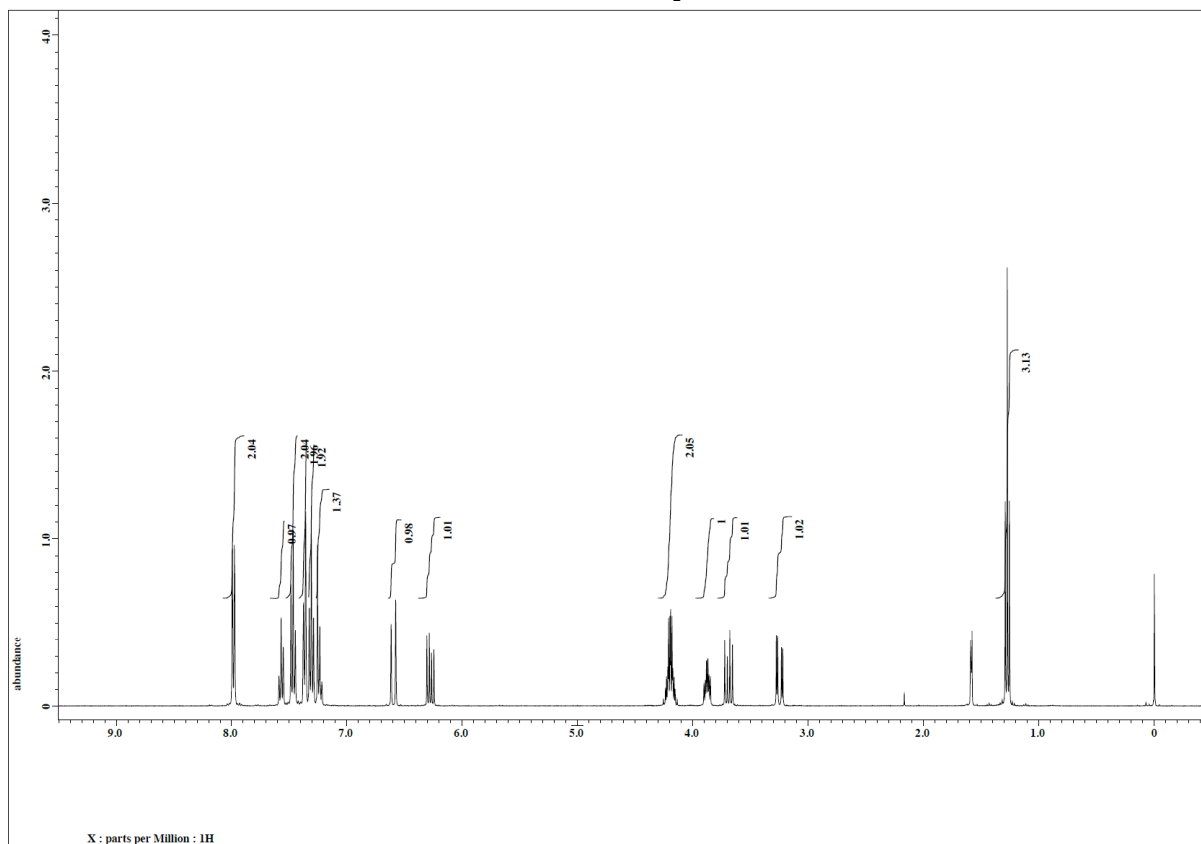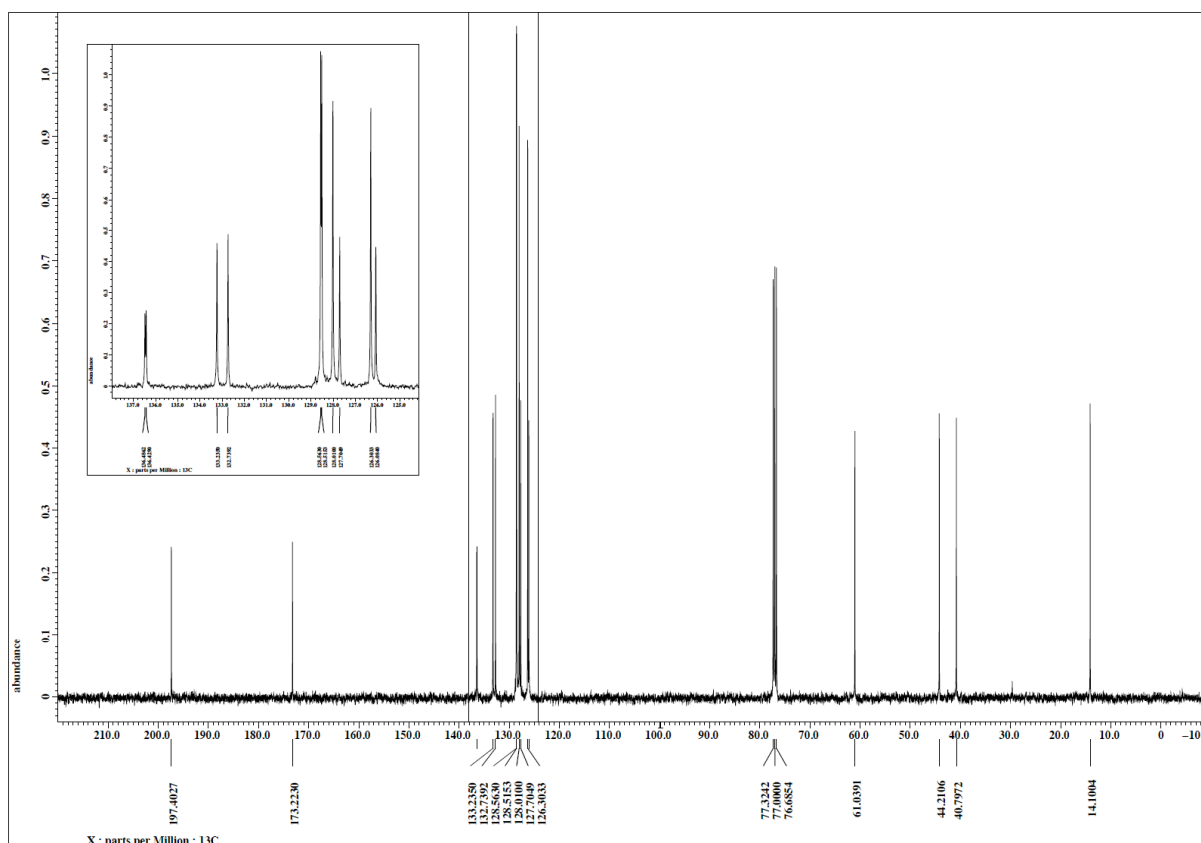

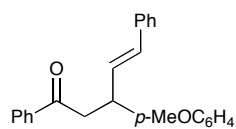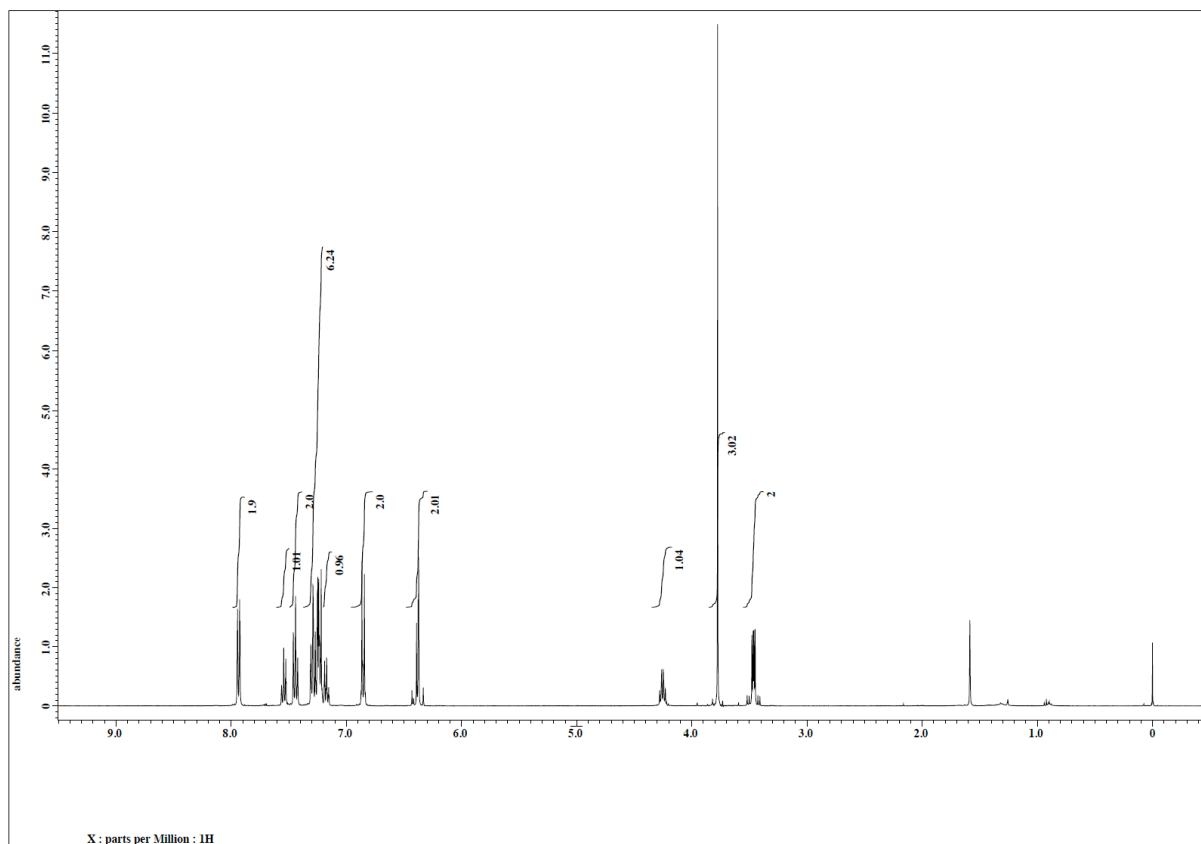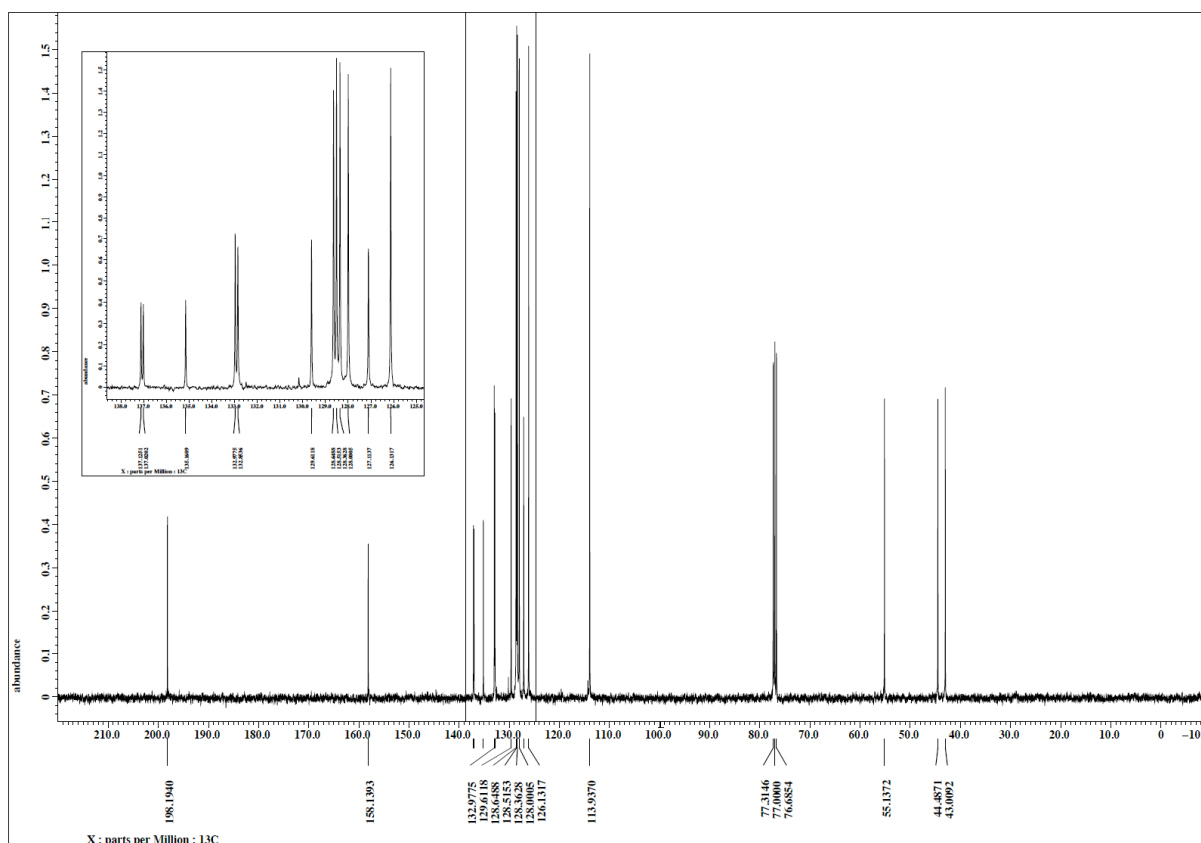

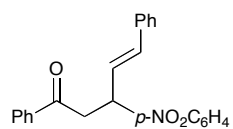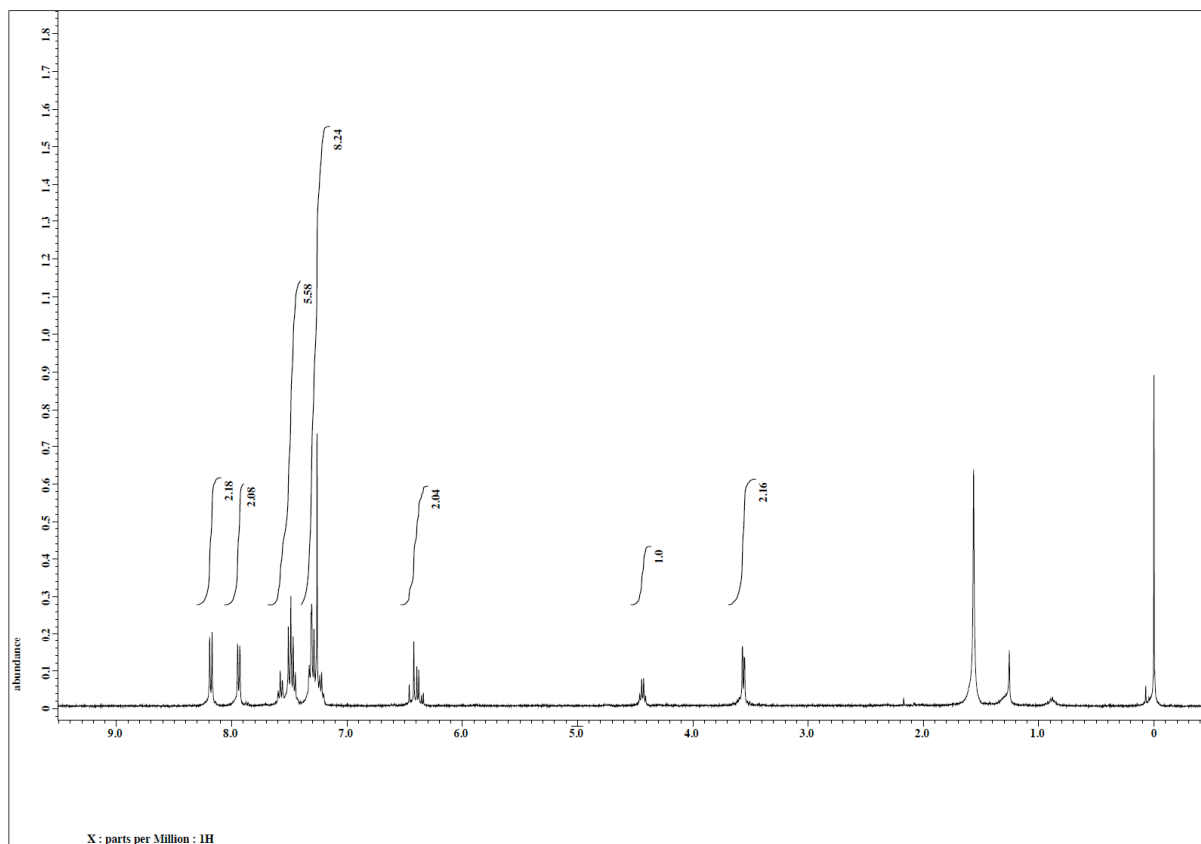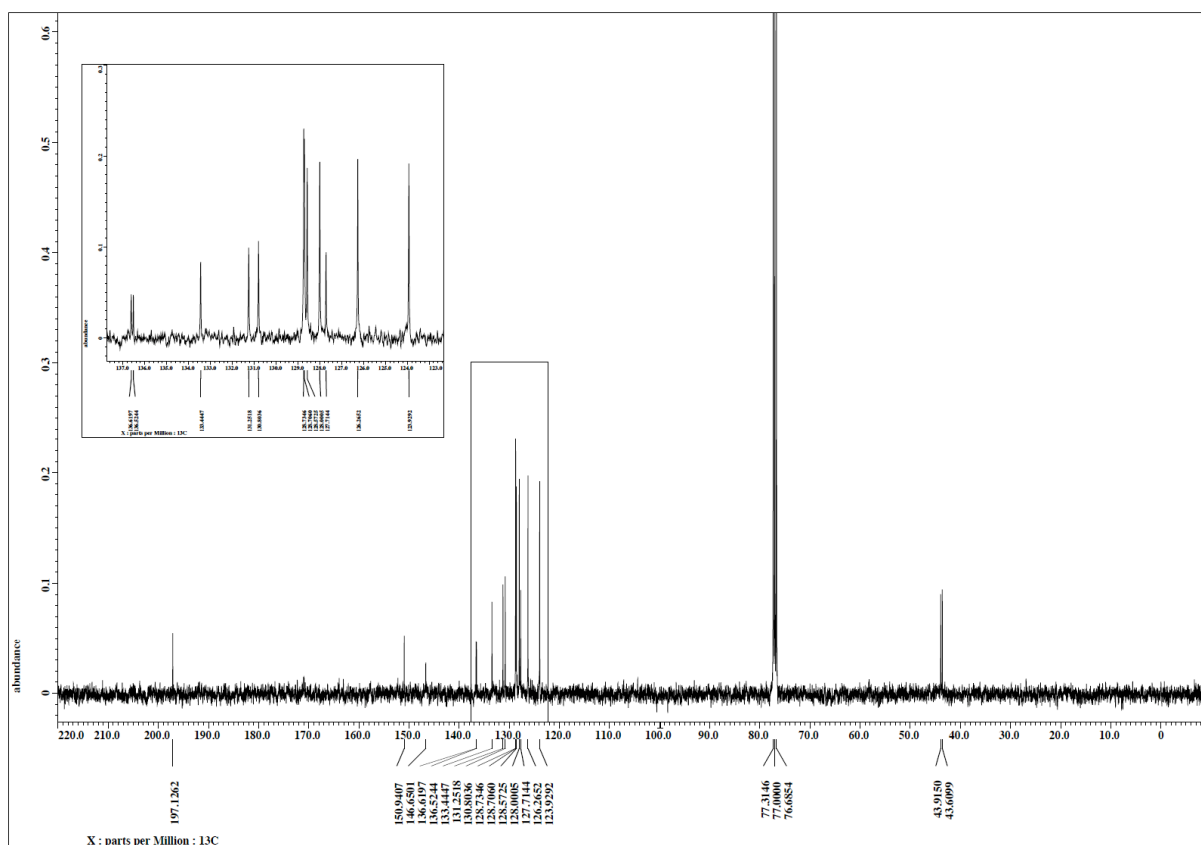

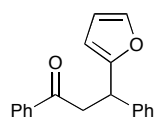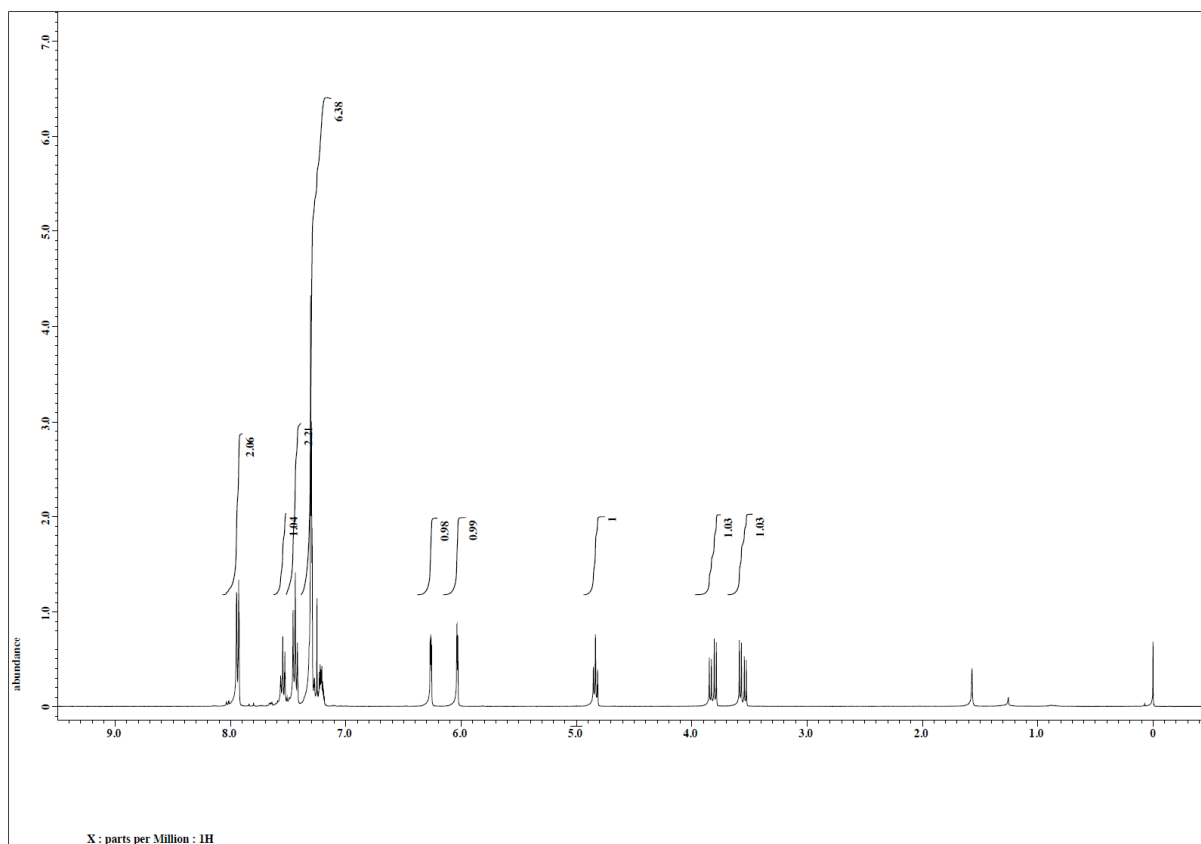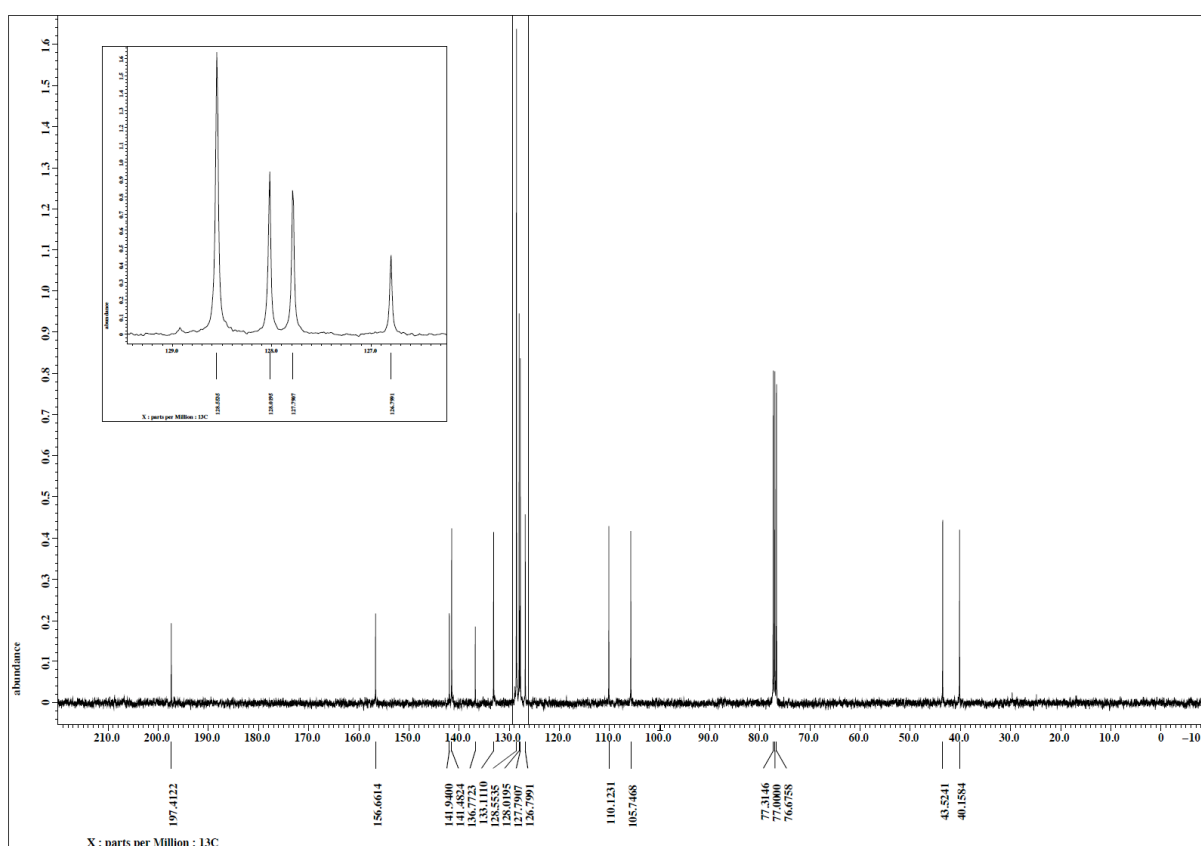

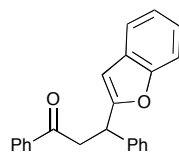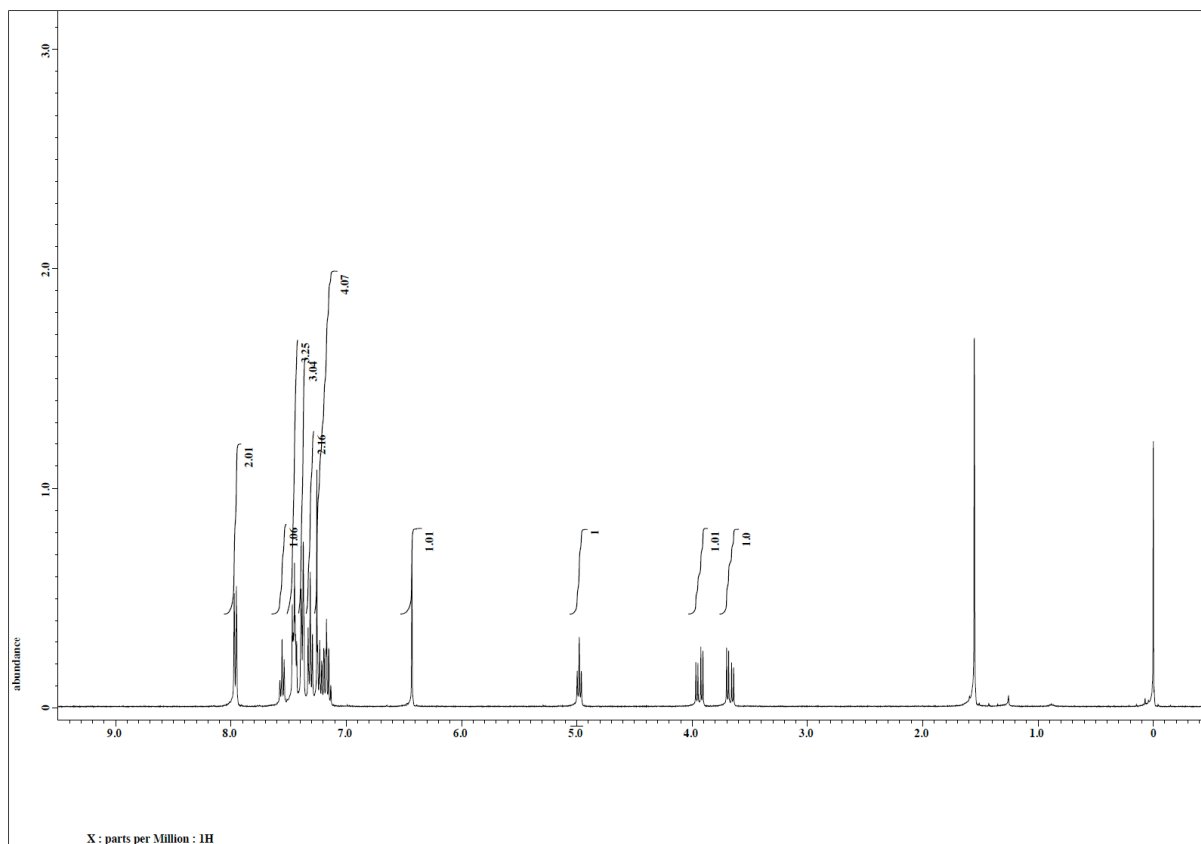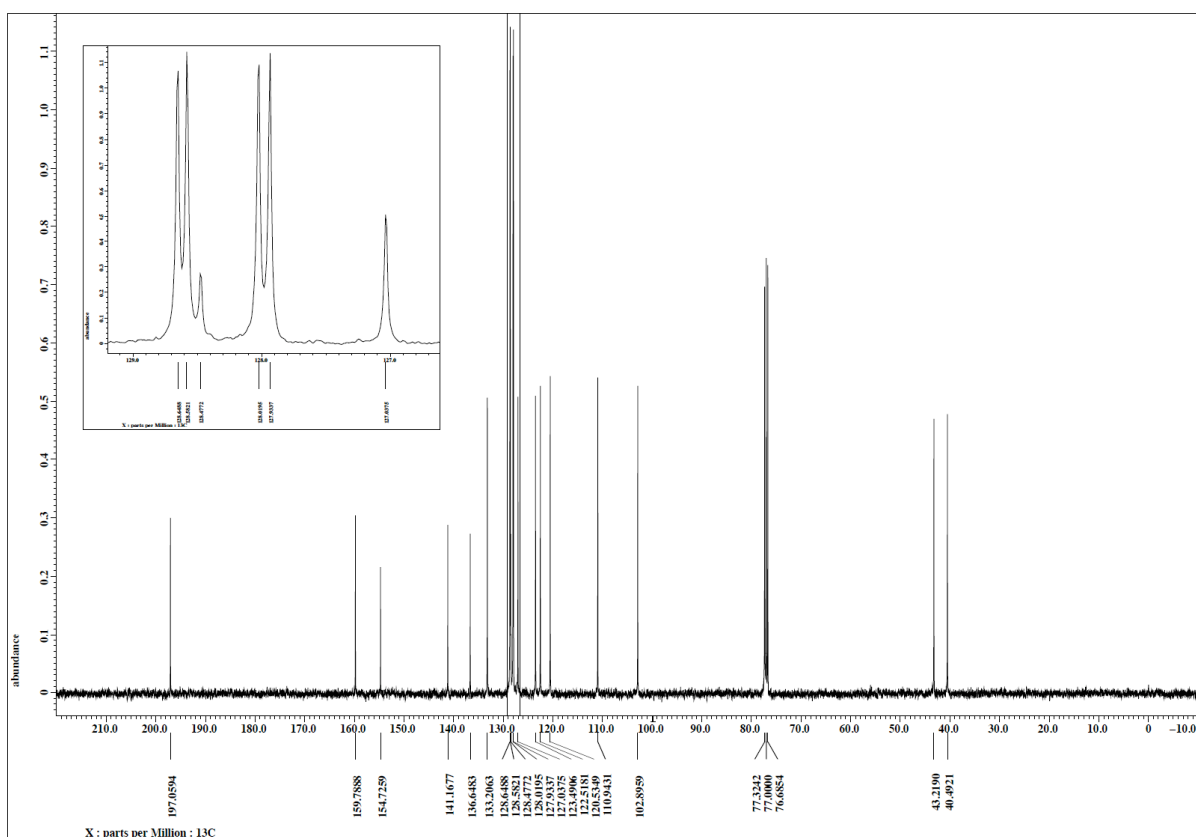

## HPLC Traces of Optically Active Compounds

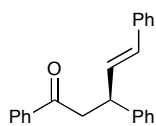

(S)-4a  
CHIRALPAK AD-H  
Hexane/iPrOH = 200/1  
1.0 mL/min, 254 nm

### 1. Racemic

C-RSA CHROMATOPAC CH=1 Report No.=5 DATA=1:CHRM1.C00 08/12/17 17:40:28

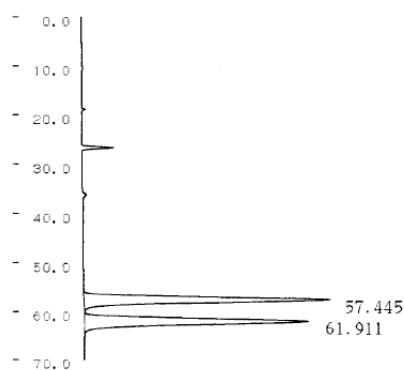

\*\* CALCULATION REPORT \*\*

| CH    | PKNO | TIME   | AREA     | HEIGHT | MK | IDNO | CONC    | NAME |
|-------|------|--------|----------|--------|----|------|---------|------|
| 1     | 8    | 57.445 | 7238330  | 92439  |    |      | 49.9225 |      |
|       | 9    | 61.911 | 7260799  | 84120  |    |      | 50.0775 |      |
| TOTAL |      |        | 14499129 | 176559 |    |      | 100     |      |

### 2. Optically active (87% ee)

CH. 1 C.5 1.25 ATT 10 OFFS 0 00/00/00 00:46

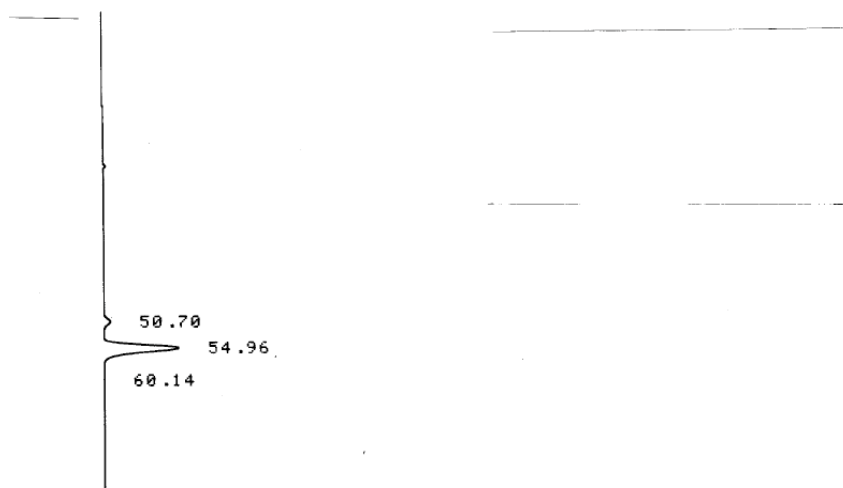

D-2500

00/00/00 00:46

METHOD: TAG: 1 CH: 1

FILE: 0 CALC-METHOD: AREA% TABLE: 0 CONC: AREA

| NO.        | RT    | AREA    | CONC    | BC |
|------------|-------|---------|---------|----|
| 1          | 50.70 | 579981  | 6.628   | BU |
| 2          | 54.96 | 8171121 | 93.372  | UB |
| TOTAL      |       | 8751102 | 100.000 |    |
| PEAK REJ : |       | 0       |         |    |

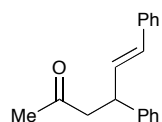

**4b**  
CHIRALPAK AD-H  
Hexane/PrOH = 300/1  
1.0 mL/min, 254 nm

## 1. Racemic

C RSA CHROMATOPAC CH-1 Report No.=12 DATA=1:CHRM1.C00 10 05 19 16:55:18

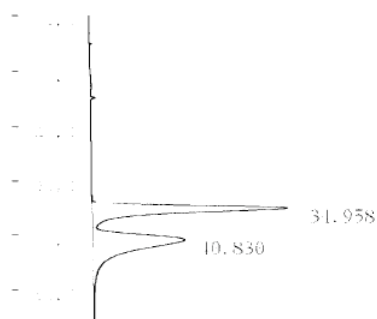

**\*\* CALCULATION REPORT \*\***

| CH    | PKNO | TIME   | AREA    | HEIGHT | MK | IDNO | CONC    | NAME |
|-------|------|--------|---------|--------|----|------|---------|------|
| 1     | 5    | 31.958 | 1511650 | 16212  |    |      | 50.1171 |      |
|       | 6    | 10.83  | 1534415 | 7653   | V  |      | 49.8829 |      |
| TOTAL |      |        | 3076095 | 23865  |    |      | 100     |      |

C RSA CHROMATOPAC CH-1 Report No.=1 DATA=1:CHRM1.C00 10 05 20 09:55:22

**\*\* CALCULATION REPORT \*\***

| CH    | PKNO | TIME   | AREA    | HEIGHT | MK | IDNO | CONC    | NAME |
|-------|------|--------|---------|--------|----|------|---------|------|
| 1     | 1    | 11.602 | 51178   | 5661   |    |      | 10.2043 |      |
|       | 2    | 45.909 | 1503674 | 28411  | V  |      | 89.7957 |      |
| TOTAL |      |        | 5015443 | 34071  |    |      | 100     |      |

## 2. Optically active (81% ee)

CH. 1 C.S 1.25 ATT 8 OFFS 0 00/00/00 00:40

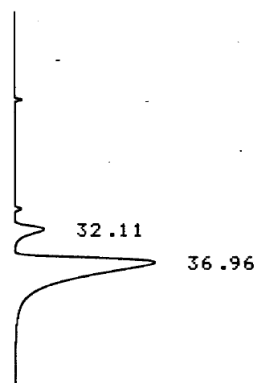

D-2500 00/00/00 00:40

METHOD: TAG: 1 CH: 1

FILE: 0 CALC-METHOD: AREA% TABLE: 0 CONC: AREA

| NO.        | RT    | AREA    | CONC    | BC |
|------------|-------|---------|---------|----|
| 1          | 32.11 | 782281  | 9.298   | BB |
| 2          | 36.96 | 7631590 | 90.702  | BB |
| TOTAL      |       | 8413871 | 100.000 |    |
| PEAK REJ : |       | 0       |         |    |

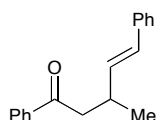

**4c**  
CHIRALPAK AD-H  
Hexane/iPrOH = 99/1  
1.0 mL/min, 254 nm

## 1. Racemic

C-R8A CHROMATOPAC CH=1 Report No.=4 DATA=1:@CHRM1.C00 09/09/17 12:50:50

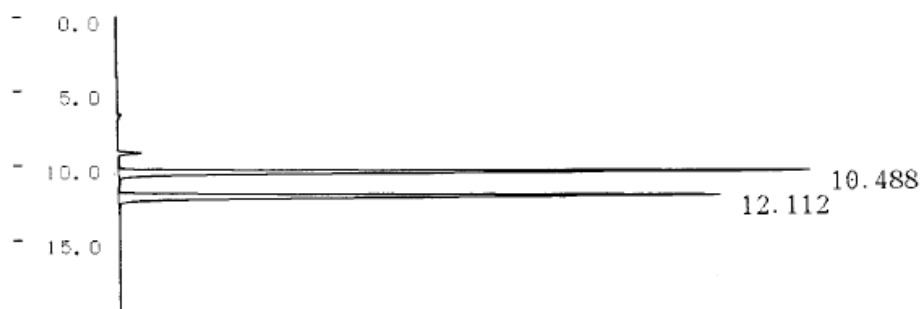

### \*\* CALCULATION REPORT \*\*

| CH    | PKNO | TIME   | AREA    | HEIGHT | MK | IDNO | CONC    | NAME |
|-------|------|--------|---------|--------|----|------|---------|------|
| 1     | 6    | 10.488 | 2191120 | 170875 |    |      | 50.1068 |      |
|       | 7    | 12.112 | 2181777 | 148769 | S  |      | 49.8932 |      |
| TOTAL |      |        | 4372898 | 319644 |    |      | 100     |      |

## 2. Optically active (81% ee)

C-R8A CHROMATOPAC CH=1 Report No.=5 DATA=1:@CHRM1.C00 10/07/13 17:54:14

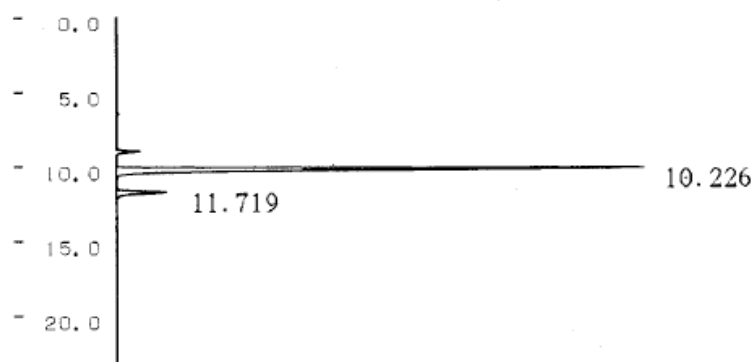

### \*\* CALCULATION REPORT \*\*

| CH    | PKNO | TIME   | AREA     | HEIGHT  | MK | IDNO | CONC   | NAME |
|-------|------|--------|----------|---------|----|------|--------|------|
| 1     | 15   | 10.226 | 12170047 | 1045039 | E  |      | 90.407 |      |
|       | 16   | 11.719 | 1291356  | 97330   | V  |      | 9.593  |      |
| TOTAL |      |        | 13461401 | 1142370 |    |      | 100    |      |



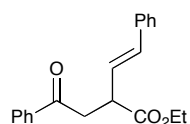

**4d**  
CHIRALPAK AD-H  
Hexane/PrOH = 19/1  
1.0 mL/min, 254 nm

## 1. Racemic

C-RSA CHROMATOPAC CH=1 Report No.=2 DATA=1:@CHRM1.C00 09/09/12 14:58:10

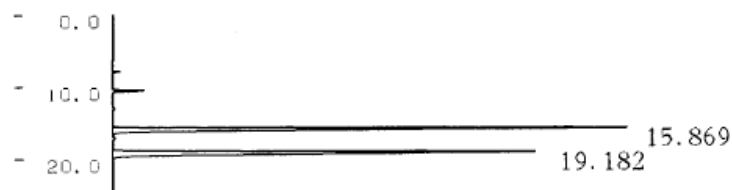

### \*\* CALCULATION REPORT \*\*

| CH    | PKNO | TIME   | AREA     | HEIGHT | MK | IDNO | CONC    | NAME |
|-------|------|--------|----------|--------|----|------|---------|------|
| 1     | 9    | 15.869 | 5245144  | 264449 |    |      | 49.4619 |      |
|       | 11   | 19.182 | 5359266  | 217235 |    |      | 50.5381 |      |
| TOTAL |      |        | 10604410 | 481683 |    |      | 100     |      |

## 2. Optically active (85% ee)

C-RSA CHROMATOPAC CH=1 Report No.=3 DATA=1:@CHRM1.C00 10/05/14 09:17:26

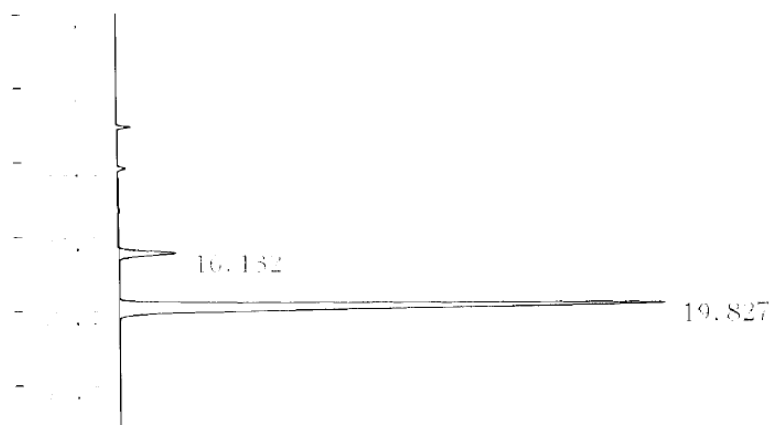

### \*\* CALCULATION REPORT \*\*

| CH    | PKNO | TIME   | AREA    | HEIGHT | MK | IDNO | CONC    | NAME |
|-------|------|--------|---------|--------|----|------|---------|------|
| 1     | 5    | 16.132 | 296307  | 14047  |    |      | 7.6861  |      |
|       | 6    | 19.827 | 3558801 | 135279 |    |      | 92.3139 |      |
| TOTAL |      |        | 3855107 | 149326 |    |      | 100     |      |

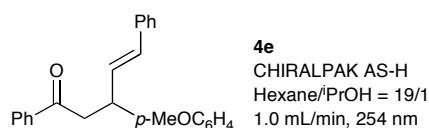

## 1. Racemic

C-R8A CHROMATOPAC CH=1 Report No.=12 DATA=1:@CHRM1.C00 10/07/16 18:06:00

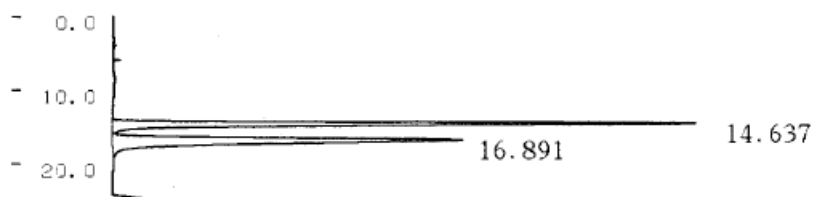

### \*\* CALCULATION REPORT \*\*

| CH    | PKNO | TIME   | AREA    | HEIGHT | MK | IDNO | CONC    | NAME |
|-------|------|--------|---------|--------|----|------|---------|------|
| 1     | 17   | 14.637 | 4631026 | 146854 |    |      | 50.5447 |      |
|       | 18   | 16.891 | 4531222 | 87770  | V  |      | 49.4553 |      |
| TOTAL |      |        | 9162248 | 234624 |    |      | 100     |      |

## 2. Optically active (87% ee)

C-R8A CHROMATOPAC CH=1 Report No.=3 DATA=1:@CHRM1.C00 10/07/16 15:29:02

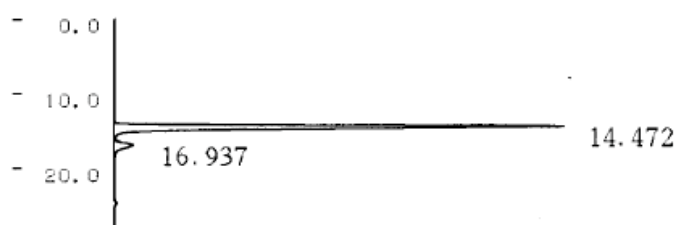

### \*\* CALCULATION REPORT \*\*

| CH    | PKNO | TIME   | AREA     | HEIGHT | MK | IDNO | CONC    | NAME |
|-------|------|--------|----------|--------|----|------|---------|------|
| 1     | 23   | 14.472 | 28049416 | 893105 |    |      | 93.3976 |      |
|       | 24   | 16.937 | 1982846  | 37216  | SV |      | 6.6024  |      |
| TOTAL |      |        | 30032262 | 930320 |    |      | 100     |      |

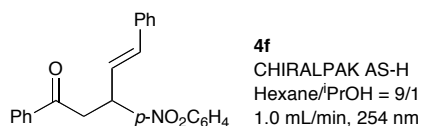

## 1. Racemic

CH. 1 C.5 1.25 ATT 6 OFFS 0 00/00/00 02:35

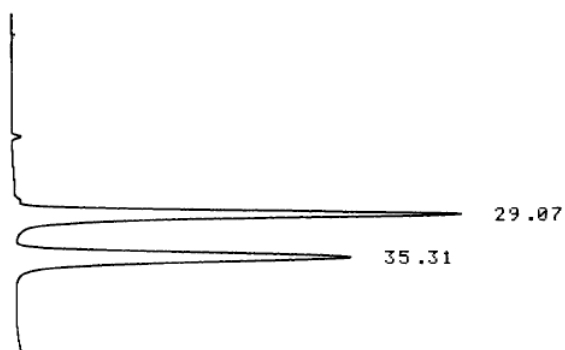

D-2500

00/00/00 02:35

METHOD: TAG: 2 CH: 1

FILE: 0 CALC-METHOD: AREA% TABLE: 0 CONC: AREA

| NO.        | RT    | AREA    | CONC    | BC |
|------------|-------|---------|---------|----|
| 1          | 29.07 | 2498870 | 50.720  | BB |
| 2          | 35.31 | 2427920 | 49.280  | BB |
| TOTAL      |       | 4926790 | 100.000 |    |
| PEAK REJ : |       | 0       |         |    |

## 2. Optically active (87% ee)

C-RSA CHROMATOPAC CH=1 Report No.=1

DATA=1:@CHRM1.C00

10/07/17 10:40:12

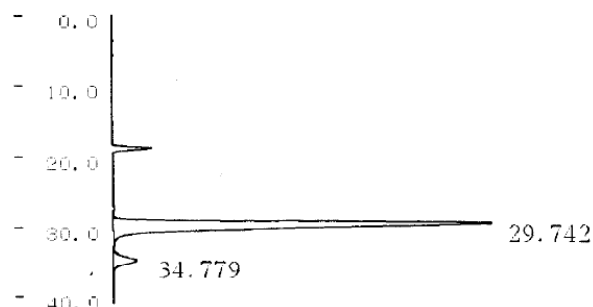

\*\* CALCULATION REPORT \*\*

| CH    | PKNO | TIME   | AREA     | HEIGHT | MK | IDNO | CONC    | NAME |
|-------|------|--------|----------|--------|----|------|---------|------|
| 1     | 10   | 29.742 | 12714868 | 198363 |    |      | 93.3704 |      |
|       | 11   | 34.779 | 902790   | 12080  |    |      | 6.6296  |      |
| TOTAL |      |        | 13617657 | 210443 |    |      | 100     |      |

C-RSA CHROMATOPAC CH=1 Report No.=2

DATA=1:@CHRM1.C00

10/07/17 10:40:12

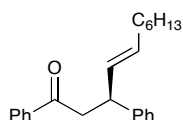

(S)-4g  
CHIRALCEL OD-H  
Hexane/iPrOH = 99/1  
1.0 mL/min, 254 nm

## 1. Racemic

C-R8A CHROMATOPAC CH=1 Report No.=2

DATA=1:@CHRM1.C00 10/07/20 14:00:42

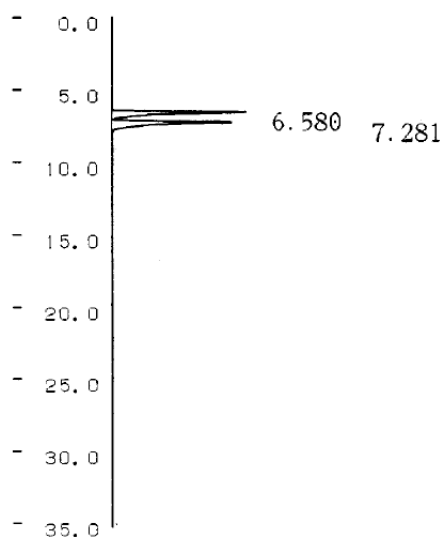

### \*\* CALCULATION REPORT \*\*

| CH    | PKNO | TIME  | AREA    | HEIGHT | MK | IDNO | CONC    | NAME |
|-------|------|-------|---------|--------|----|------|---------|------|
| 1     | 3    | 6.58  | 902225  | 69007  |    |      | 49.9261 |      |
|       | 4    | 7.281 | 904896  | 61571  | V  |      | 50.0739 |      |
| TOTAL |      |       | 1807120 | 130578 |    |      | 100     |      |

## 2. Optically active (69% ee)

C-R8A CHROMATOPAC CH=1 Report No.=2

DATA=1:@CHRM1.C00 10/08/31 10:58:04

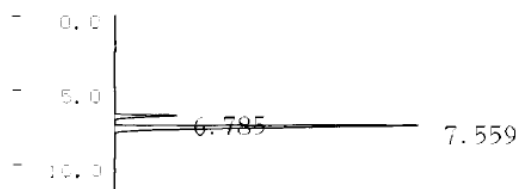

### \*\* CALCULATION REPORT \*\*

| CH    | PKNO | TIME  | AREA    | HEIGHT | MK | IDNO | CONC    | NAME |
|-------|------|-------|---------|--------|----|------|---------|------|
| 1     | 3    | 6.785 | 168302  | 15691  |    |      | 15.5901 |      |
|       | 4    | 7.559 | 911238  | 75261  | V  |      | 84.4099 |      |
| TOTAL |      |       | 1079540 | 90952  |    |      | 100     |      |

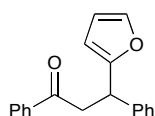

**4h**  
CHIRALCEL OD-3  
Hexane/PrOH = 49/1  
1.0 mL/min, 254 nm

## 1. Racemic

CH. 1 C.S 5.00 ATT 8 OFFS 0 00/00/00 00:35

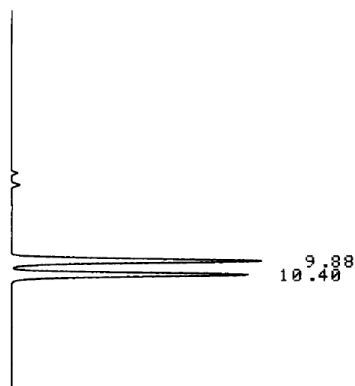

D-2500

00/00/00 00:35

METHOD: TAG: 1 CH: 1

FILE: 0 CALC-METHOD: AREA% TABLE: 0 CONC: AREA

| NO. | RT    | AREA   | CONC   | BC |
|-----|-------|--------|--------|----|
| 1   | 9.88  | 837471 | 49.856 | BU |
| 2   | 10.40 | 842313 | 50.144 | UB |

TOTAL 1679784 100.000

PEAK REJ : 0

## 2. Optically active (68% ee)

CH. 1 C.S 5.00 ATT 7 OFFS 0 00/00/00 01:36

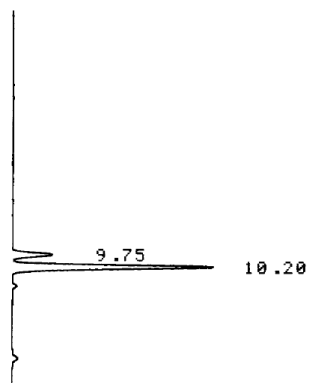

D-2500

00/00/00 01:36

METHOD: TAG: 3 CH: 1

FILE: 0 CALC-METHOD: AREA% TABLE: 0 CONC: AREA

| NO. | RT    | AREA   | CONC   | BC |
|-----|-------|--------|--------|----|
| 1   | 9.75  | 65234  | 15.974 | BU |
| 2   | 10.20 | 343148 | 84.026 | UB |

TOTAL 408382 100.000

PEAK REJ : 0

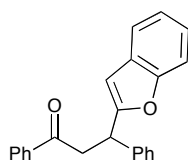

4i  
CHIRALPAK AD-H  
Hexane/PrOH = 39/1  
1.0 mL/min, 254 nm

## 1. Racemic

C-R8A CHROMATOPAC CH=1 Report No.=5 DATA=1:@CHRM1.C00 09/08/06 16:30:12

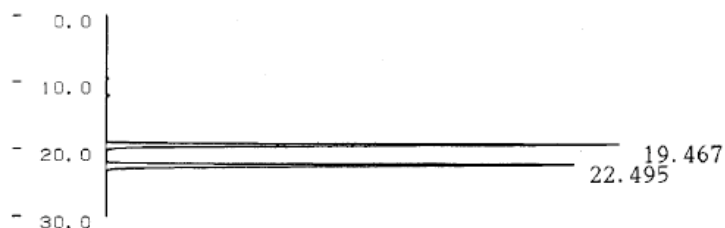

### \*\* CALCULATION REPORT \*\*

| CH    | PKNO | TIME   | AREA    | HEIGHT | MK | IDNO | CONC    | NAME |
|-------|------|--------|---------|--------|----|------|---------|------|
| 1     | 15   | 19.467 | 3231387 | 140497 | S  |      | 49.9885 |      |
|       | 17   | 22.495 | 3232877 | 128072 | S  |      | 50.0115 |      |
| TOTAL |      |        | 6464264 | 268569 |    |      | 100     |      |

## 2. Optically active (81% ee)

CH. 1 C.S 1.25 ATT 9 OFFS 0 00/00/00 00:07

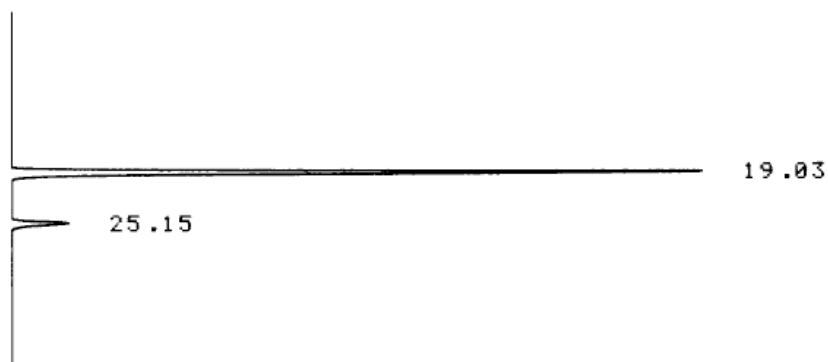

D-2500

00/00/00 00:07

METHOD: TAG: 1 CH: 1

FILE: 0 CALC-METHOD: AREA% TABLE: 0 CONC: AREA

| NO.        | RT    | AREA    | CONC    | BC |
|------------|-------|---------|---------|----|
| 1          | 19.03 | 8102660 | 90.287  | BB |
| 2          | 25.15 | 871633  | 9.713   | BB |
| TOTAL      |       | 8974293 | 100.000 |    |
| PEAK REJ : |       | 0       |         |    |

---

## References

- (1) Y. Yanagida, S. Matsumoto and S. Takahashi, *Jpn. Pat.*, JP 1992235142 A.
- (2) C. R. Conard and M. A. Dolliver, *Org. Synth.*, 1943, Coll. Vol. 2, 167.
- (3) T. R. Wu and J. M. Chong, *J. Am. Chem. Soc.*, 2007, **129**, 4908.
- (4) E. C. Burger and J. A. Tunge, *Org. Lett.*, 2004, **15**, 2603.
- (5) S. Ogoshi, T. Haba and M. Ohashi, *J. Am. Chem. Soc.* 2009, **131**, 10350.
